# Supplementary material
Source: bioRxiv or medRxiv preprint supplement (https://www.biorxiv.org/highwire/filestream/124903/field_highwire_adjunct_files/0/413732-1.pdf)
Supplement: Supplementary file [file 413732-1.pdf]

# Supplementary figure S1

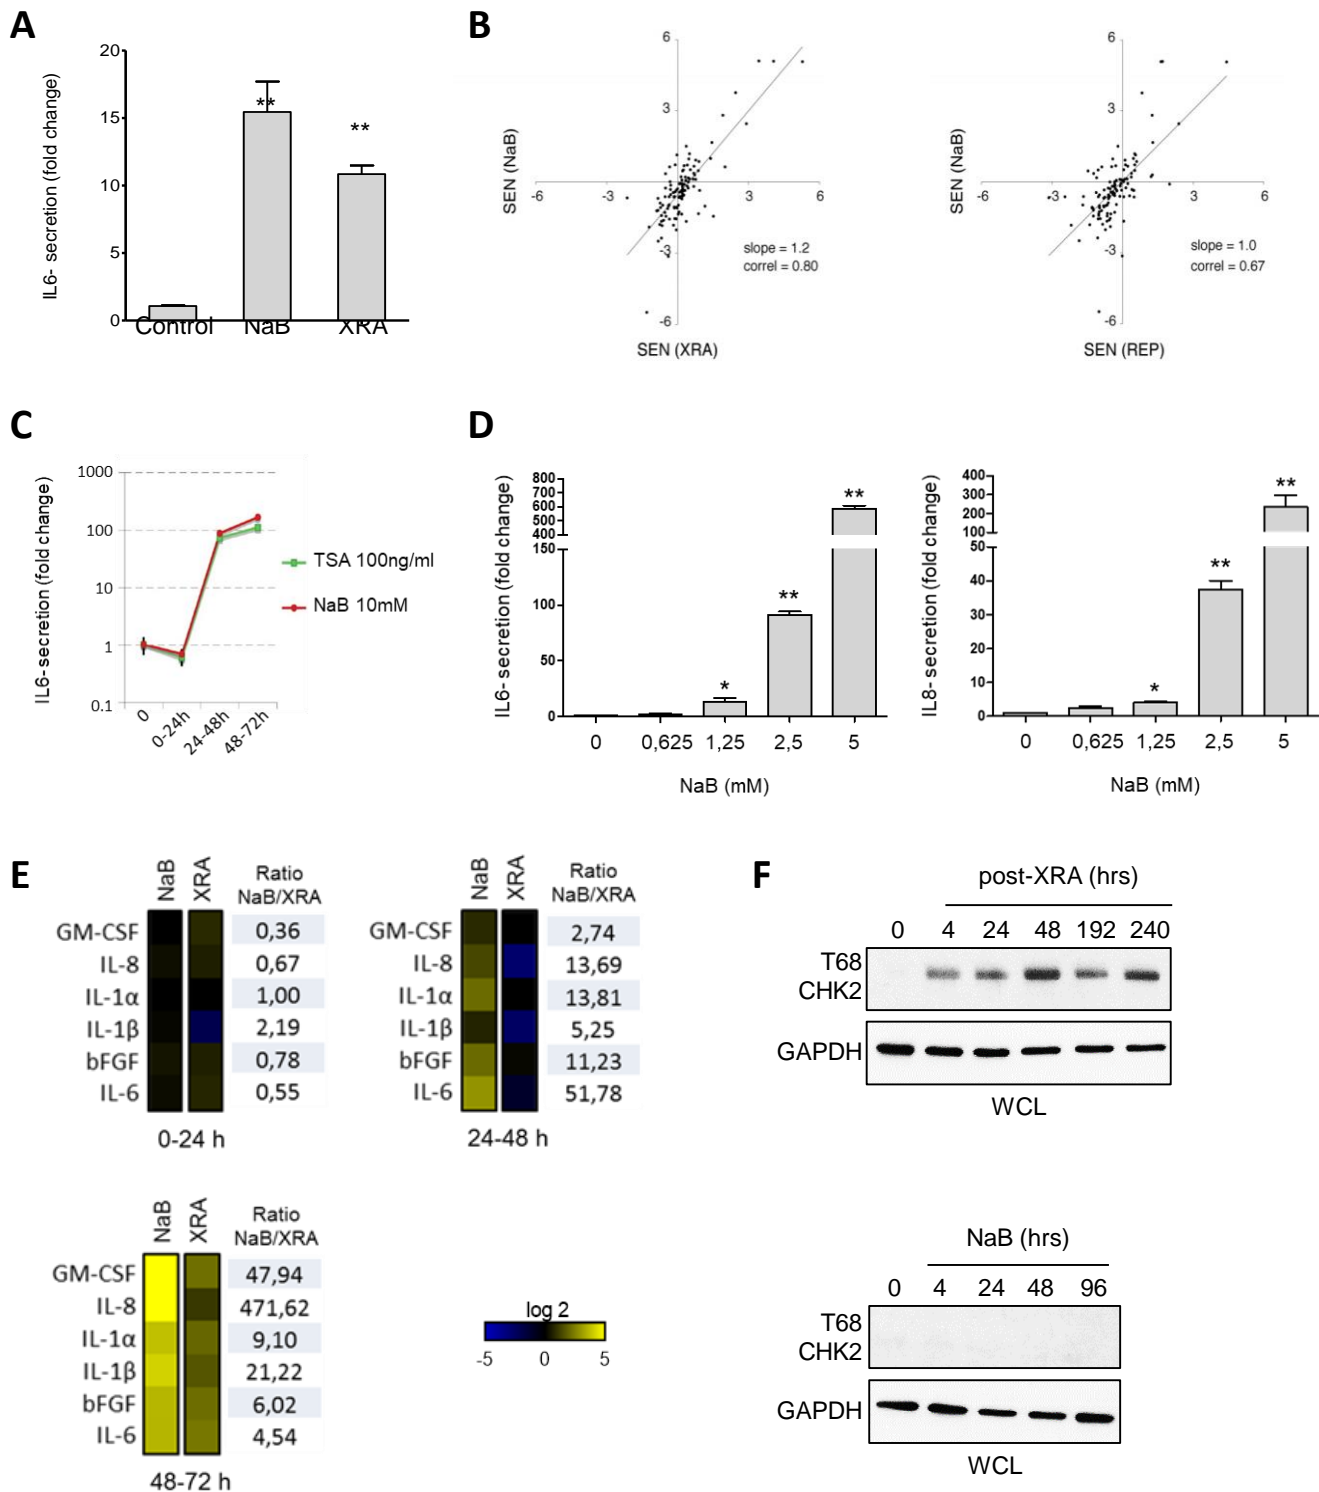

# Supplementary figure S2

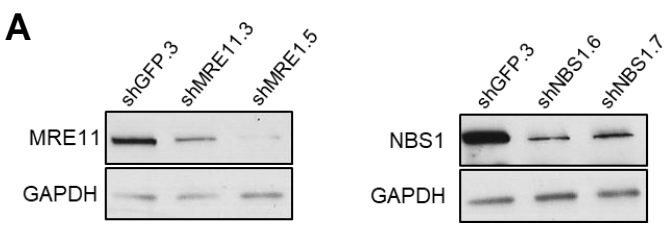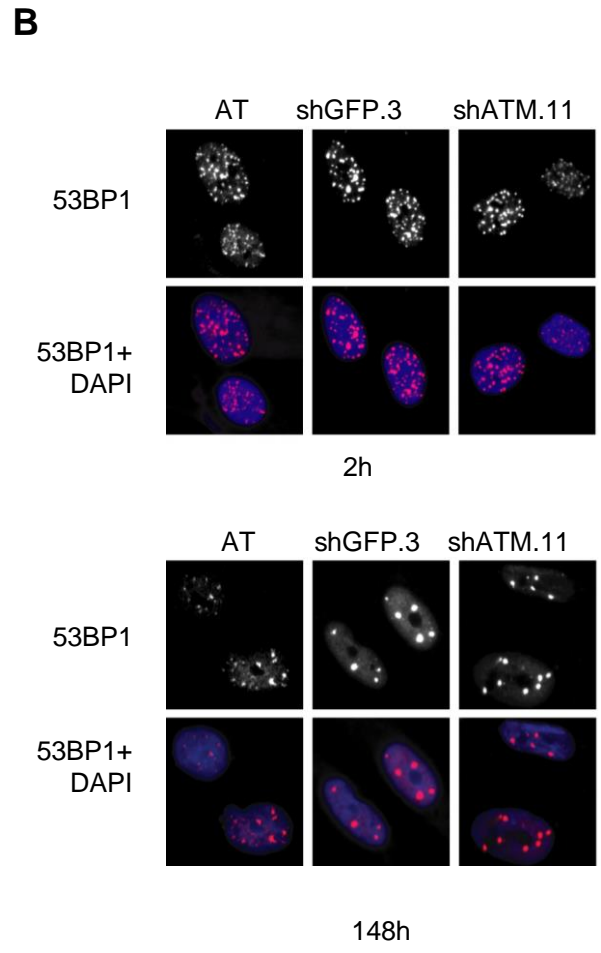

# Supplementary figure S3

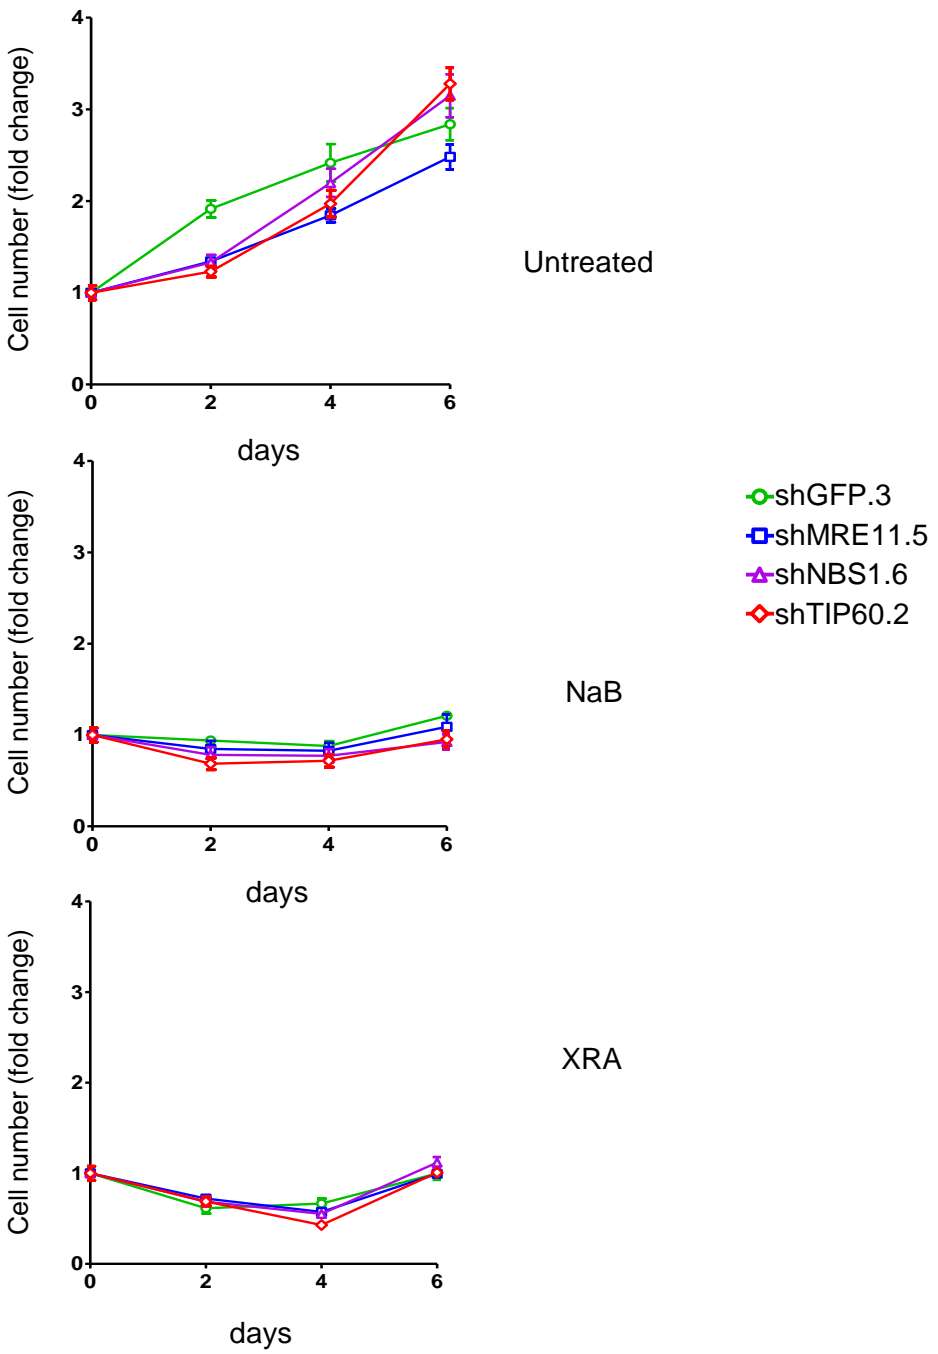

**Supplementary figure S4**

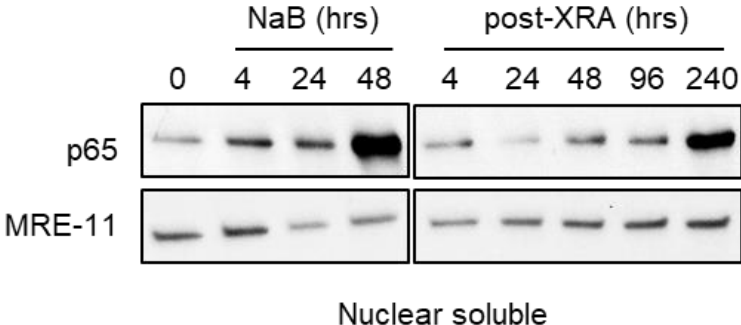

## Supplementary table 1: list of primary antibodies

| Antibodies          | Compagny       | Clone/Cat #    | WB dilution | IF dilution |
|---------------------|----------------|----------------|-------------|-------------|
| 53BP1               | Novus          | NB100-305      | 1:2000      | 1:2000      |
| γH2AX               | Novus          | NB100-384      | 1:2000      | 1:1000      |
| PML                 | Santa cruz     | N-19/SC-9862   | -           | 1:500       |
| ATM                 | AbCam          | 2C11A1/Ab78    | 1:2000      | -           |
| Phospho-ATM (S1981) | Cell signaling | 10H11.E12/4526 | 1:2000      | -           |
| NBS1                | Cell signaling | D6J5I          | 1:1000      | -           |
| MRE-11              | Cell signaling | 31H4           | 1:2000      | -           |
| Phospho CHK2 (T68)  | Santa Cruz     | SC-16297-R     | 1:500       | -           |
| HA                  | Santa Cruz     | Y-11/SC-805    | 1:500       | -           |
| GCN5                | Cell signaling | C26A10         | 1:1000      | -           |
| PCAF                | Cell signaling | C14G9          | 1:1000      | -           |
| CBP                 | Cell signaling | D6C5           | 1:1000      | -           |
| p300                | Cell signaling | BD Pharmingen  | 1:500       | -           |
| H2AK5Ac             | Cell signaling | 2576           | 1:2000      | -           |
| H2BK5Ac             | Cell signaling | D5H1S          | 1:2000      | -           |
| H3K9Ac              | Cell signaling | C5B11          | 1:2000      | -           |
| H3K18Ac             | Cell signaling | D8Z5H          | 1:2000      | -           |
| H3K27Ac             | Cell signaling | D5E4           | 1:2000      | -           |
| H4K5Ac              | Cell signaling | D12B3          | 1:2000      | -           |
| H4K8Ac              | Cell signaling | 2594           | 1:2000      | -           |
| Histone H3          | Cell signaling | D1H2           | 1:2000      | -           |
| Histone H4          | Cell signaling | L64C1          | 1:4000      | -           |
| SP1                 | Sigma          | HPA001853      | 1:1000      | -           |
| Tubulin             | Santa cruz     | DM1A/sc-32293  | 1:2000      | -           |
| GAPDH               | Cell signaling | 14C10          | 1:2000      | -           |

## Supplementary table 2 : list of primers for qPCR

| Target        |    | Sequences                      | Application |
|---------------|----|--------------------------------|-------------|
| Tip60         | Fw | 5'-CACAGATCACCATCAATGAGATTA-3' | RT-qPCR     |
|               | Rv | 5'-CTCTGACAGTGTGAGGATGTA-3'    |             |
| TRRAP         | Fw | 5'-CCGATCACACAAGAAATTCATC-3'   | RT-qPCR     |
|               | Rv | 5'-TCTCAAAGTAGCGGTTCACT-3'     |             |
| IL-6 promoter | Fw | 5'-ACCCTCACCTCCAACAA-3'        | CHiP (qPCR) |
|               | Rv | 5'-AGACATCTCCAGTCCTATATT-3'    |             |
| IL-8 promoter | Fw | 5'-CCAAATTGTGGAGCTTCAGT-3'     | CHiP (qPCR) |
|               | Rv | 5'-TTCCTTCCGGTGGTTTCTTC-3'     |             |
| RPL30         | Fw | Cell signaling (#7014)         | CHiP (qPCR) |
|               | Rv | Cell signaling (#7015)         |             |
